# Supplementary material for: Impact of Mixing on Content Uniformity of Thin Polymer Films Containing Drug Micro-Doses
Source: Pharmaceutics. 2021 May 29;13(6):812. doi: 10.3390/pharmaceutics13060812 (PMC8229899; doi:10.3390/pharmaceutics13060812)
Supplement: Supplementary file 1 [file pharmaceutics-13-00812-s001.zip › pharmaceutics-1236423-supplementary.pdf]

# Supplementary Materials: Impact of Mixing on Content Uniformity of Thin Polymer Films Containing Drug Micro-Doses

Guluzar G. Buyukgoz, Jeremiah N. Castro, Andrew E. Atalla, John G. Pentangelo, Siddharth Tripathi and Rajesh N. Davé

**Table S1.** Factors and levels of mixing processing conditions through Taguchi L9 orthogonal array.

| Factors      | Level 1  | Level 2      | Level 3     |
|--------------|----------|--------------|-------------|
| Mixer Type   | Impeller | Planetary    | Vibrational |
| Mixing Speed | Low      | Medium       | High        |
| Mixing Time  | Slow     | Intermediate | Fast        |

**Table S2.** RSD% values of drug amount (mg) per sample from precursor suspensions and dried-films.

| Run  | RSD%<br>(Precursor) | RSD%<br>(Dried-film) |
|------|---------------------|----------------------|
| F111 | 19.01               | 5.28                 |
| F122 | 6.55                | 4.31                 |
| F133 | 1.59                | 3.14                 |
| F231 | 2.71                | 5.05                 |
| F212 | 9.69                | 4.35                 |
| F223 | 4.04                | 2.02                 |
| F321 | 17.69               | 8.17                 |
| F332 | 6.89                | 4.87                 |
| F313 | 27.83               | 15.95                |

**Table S3.** Response table of S/N ratios for RSD% of drug content uniformity based on drug dose (mg/cm<sup>2</sup>).

| Level | Type   | Intensity | Time   |
|-------|--------|-----------|--------|
| 1     | −12.36 | −17.09    | −15.59 |
| 2     | −10.98 | −12.35    | −13.07 |
| 3     | −18.68 | −12.58    | −13.37 |
| Delta | 7.7    | 4.75      | 2.52   |
| Rank  | 1      | 2         | 3      |

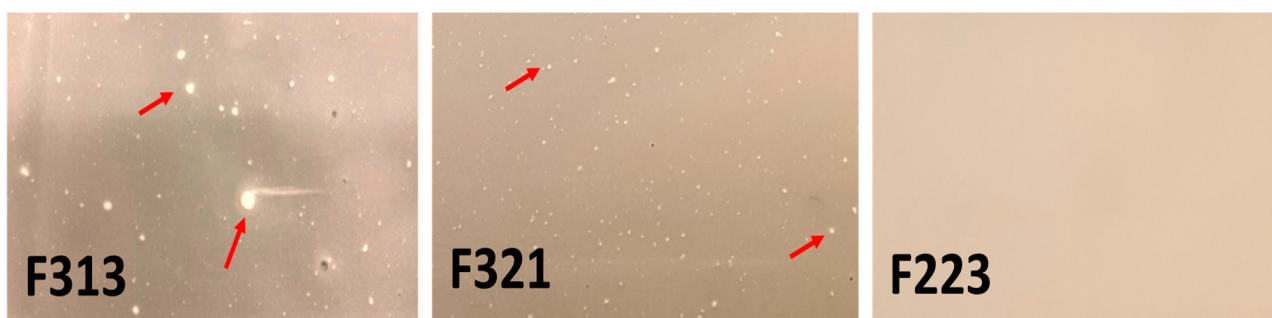

**Figure S1.** Digital images of dried-films containing ~23 wt% FNB concentration processed at different mixing conditions; F313, F321, and F223.
